# Supplementary material for: Facility ownership and mortality among older adults residing in care homes
Source: PubMed Central journal article supplement (PMC6396963; doi:10.1371/journal.pone.0197789), 2019-03-01
Supplement: pone.0197789.s001.pdf [file pone.0197789.s001.pdf]

## APPENDIX

### 1. Supplementary methods

#### 1.1. Types of facilities. Definitions as were used in this work

#### 1.2. Complete description of the methods of mortality analysis

### 2. Supplementary results and tables

#### 2.1. Sensitivity analysis further stratifying length of stay

#### 2.2. S1 Table A. Selected Characteristics of Studies Showing Results of Ownership and Mortality in Nursing Homes

#### 2.3. S1 Table B. Distribution of baseline characteristics by type of facility after standardization to the overall institutionalized population

\* \* \*

### 1. Supplementary methods

#### 1.1. Types of facilities. Definitions as were used in this work

These definitions apply to the reality of 1999. In the present moment, the situation is basically the same, but other types of organizations have come into the market, for example facilities whose property is public but managed by a private company.

*Public.* Facilities completely owned by a public administration (Government)

*Private.* Non-public (Facilities completely owned by a private organization).

*Subsidized.* Private facilities with a majority of their residents' fees/costs partly or wholly covered by a public administration. These facilities usually receive residents similar to that of public facilities. Thus they combine the type of resident that would be admitted into a public facility but with the characteristics of private management, although the contract agreements between the public administration and the private companies usually include clauses of quality that could be assimilated to the public residences.

A *non-profit* organization is an entity whose purpose is not the pursuit of an economic benefit but mainly pursues a social, altruistic or humanitarian purpose. These types of institutions are usually financed through grants and donations from individuals, companies, and institutions and organizations of all kinds. We included companies expressly defined as non-profit and those owned by religious organizations.

We characterized as *for-profit* those private companies for which we found no indication of non-profit status, and thus we assumed that they are organizations that include making money as one of their primary goals.

Some features of the Spanish long-term care system can be found in: *Damián J, Pastor-Barriuso R, Valderrama-Gama E. Descriptive epidemiology of undetected depression in institutionalized older people. J Am Med Dir Assoc. 2010;11(5):312-9 (Reference 23).*

## **1.2. Complete description of the methods of mortality analysis**

For mortality risk analyses, we used Kaplan-Meier methods and spline-based survival models<sup>19</sup> weighted by the above combined weights and stratified by type of facility. This allowed us to obtain nonparametric and smooth estimates of the mortality curves that would have been observed in the institutionalized population had every resident been cared for in each given type of facility<sup>18</sup>. Spline-based survival models parameterized stratum-specific log cumulative hazards as distinct natural cubic splines of log time with a single internal knot at the 50<sup>th</sup> percentile of the uncensored log time distribution<sup>19</sup>. Adding further internal knots did not improve model fit. We used these weighted spline-based survival models to estimate standardized differences in cumulative mortality at 2, 5, and 10 years of follow-up for each type of facility compared with large-sized public facilities (as reference) – with 95% confidence intervals (CIs) derived from robust standard errors of spline coefficients by applying delta methods. In addition to risk differences, we estimated standardized differences in median follow-up times (50% cumulative mortality) and their 95% CIs, comparing each type of facility with large-sized public facilities.

We evaluated homogeneity in risk differences across pre-specified subgroups of residents defined by baseline age (65–84 or  $\geq 85$  years), sex (woman or man), educational level (less than

primary, or primary, or more), length of stay (<3 or ≥3 years), dementia (yes or no), number of chronic conditions other than dementia (0–2 or ≥3), and functional dependency (no/mild or moderate/severe/total). This was done by fitting spline-based survival models weighted by combined weights and stratified by type of facility and resident subgroup. Combined weights for subgroup analyses were calculated as the product of sampling weights and subgroup-specific standardization weights, in order to standardize cumulative mortality curves in each type of facility and resident subgroup to the weighted distribution of confounders in the entire resident subgroup.<sup>16</sup> Standardized differences – in 5-year cumulative mortality and 95% CIs for each type of facility compared with large-sized public facilities – were estimated within each resident subgroup, and tested for homogeneity across subgroups by using joint Wald tests.

## **2. Supplementary results and tables**

### **2.1. Sensitivity analysis further stratifying length of stay**

In fully-adjusted models by inverse probability weighting with length of stay further stratified as <2, 2–4, and ≥5 years, the standardized 5-year mortality risk differences (95% CIs) for residents in medium-sized public/subsidized, medium-sized private, and small-sized private facilities compared with those in large-sized public institutions were –7.4% (–20.2% to 5.4%), –21.1% (–35.2% to –7.1%), and –13.4% (–26.2% to –0.6%) and the standardized differences (95% CIs) in the median survival time were 1.1 (–0.7 to 2.8), 3.9 (1.0 to 6.8), and 1.9 (0.1 to 3.7) years, respectively.

**S1 Table A.** Summary of the main characteristics of studies showing results of ownership and mortality in nursing homes.

| Authors, publication year         | Survey year      | Design                                 | Country                  | Ownership               | Follow up, years     | Higher mortality                    |
|-----------------------------------|------------------|----------------------------------------|--------------------------|-------------------------|----------------------|-------------------------------------|
| Spector & Takada, 1991 [4]        | 1984-1986        | Prospective cohort                     | Rhode Island, USA        | FP, NP                  | 0.5                  | NP                                  |
| Bell & Krivich, 1990 [5]          | 1986-1987        | Ecologic                               | Illinois, USA            | Public, Private, FP, NP | 1                    | Public <sup>a</sup>                 |
| Zinn et al, 1993 [6]              | 1987             | Ecologic                               | Pennsylvania, USA        | Private FP, NP          | 1                    | NP                                  |
| Cohen & Spector, 1996 [7]         | 1987             | Retrospective cohort                   | USA, National            | Public, Private, FP, NP | 1                    | Null                                |
| Spector, Selden & Cohen, 1998 [8] | 1987             | Retrospective cohort                   | USA, National            | Private FP, NP          | 1                    | FP (only in non-Medicaid residents) |
| Bliesmer et al, 1998 [9]          | 1989; 1990; 1991 | Retrospective cohort                   | Minnesota, USA           | FP, NP                  | Three 1-year periods | NP                                  |
| Porell et al, 1998 [10]           | 1991-1993        | Retrospective cohort                   | Massachusetts, USA       | FP, NP                  | 2.67                 | Null                                |
| Intrator et al, 1999 [11]         | 1993             | Prospective cohort                     | Ten States, USA          | FP, NP                  | 0.5                  | Null                                |
| McGregor et al, 2006 [12]         | 1996-1999        | Retrospective cohort                   | British Columbia, Canada | Public, Private, FP, NP | 3.3                  | Null                                |
| Tanuseputro et al 2015 [13]       | 2010-2012        | Retrospective cohort<br>New admissions | Ontario, Canada          | Private, public FP, NP  | 1                    | FP                                  |

*Note:* FP, for-profit; NP, not-for-profit.

<sup>a</sup> Not possible to be adequately assessed because the confidence intervals were not reported.

**S1 Table B.** Distribution of baseline characteristics by type of facility after standardization to the overall institutionalized population in Madrid, Spain, 1998–1999.

| Baseline characteristic   | Overall <sup>a</sup> | Facility <sup>b</sup> |                                |                      |                     | P value <sup>c</sup> |
|---------------------------|----------------------|-----------------------|--------------------------------|----------------------|---------------------|----------------------|
|                           |                      | Large-sized public    | Medium-sized public/subsidized | Medium-sized private | Small-sized private |                      |
| Age (years)               |                      |                       |                                |                      |                     | 0.98                 |
| 65–74                     | 13.2                 | 13.4                  | 11.6                           | 9.2                  | 13.0                |                      |
| 75–79                     | 15.5                 | 18.1                  | 13.2                           | 12.1                 | 18.5                |                      |
| 80–84                     | 24.1                 | 24.8                  | 25.9                           | 24.4                 | 25.3                |                      |
| 85–89                     | 27.0                 | 24.4                  | 29.1                           | 31.2                 | 25.6                |                      |
| ≥90                       | 20.2                 | 19.3                  | 20.2                           | 23.1                 | 17.6                |                      |
| Sex                       |                      |                       |                                |                      |                     | 0.78                 |
| Women                     | 74.5                 | 73.5                  | 68.6                           | 74.6                 | 74.3                |                      |
| Men                       | 25.5                 | 26.5                  | 31.4                           | 25.4                 | 25.7                |                      |
| Educational level         |                      |                       |                                |                      |                     | 0.70                 |
| Less than primary         | 42.3                 | 40.8                  | 45.4                           | 47.1                 | 38.0                |                      |
| Primary or more           | 57.7                 | 59.2                  | 54.6                           | 52.9                 | 62.0                |                      |
| Length of stay (years)    |                      |                       |                                |                      |                     | 0.74                 |
| <3                        | 47.0                 | 49.1                  | 46.5                           | 49.0                 | 55.7                |                      |
| ≥3                        | 53.0                 | 50.9                  | 53.5                           | 51.0                 | 44.3                |                      |
| Dementia                  |                      |                       |                                |                      |                     | 0.79                 |
| No                        | 75.1                 | 75.8                  | 79.7                           | 74.7                 | 72.5                |                      |
| Yes                       | 24.9                 | 24.2                  | 20.3                           | 25.3                 | 27.5                |                      |
| No. of chronic conditions |                      |                       |                                |                      |                     | 0.28                 |
| 0–2                       | 49.2                 | 48.4                  | 44.4                           | 39.6                 | 55.7                |                      |
| ≥3                        | 50.8                 | 51.6                  | 55.6                           | 60.4                 | 44.3                |                      |
| Functional dependency     |                      |                       |                                |                      |                     | 0.91                 |
| No/mild                   | 51.4                 | 52.9                  | 56.7                           | 53.6                 | 46.0                |                      |
| Moderate                  | 24.2                 | 23.8                  | 23.6                           | 23.4                 | 25.2                |                      |
| Severe/total              | 24.4                 | 23.3                  | 19.7                           | 23.0                 | 28.8                |                      |

<sup>a</sup> Sampling-weighted percentages.

<sup>b</sup> Fully-weighted percentages taking into account both sampling and standardization weights.

<sup>c</sup> P value for homogeneity of fully-weighted percentages across types of facility.
